1 **Soybean and cotton spermosphere soil microbiome shows dominance of soil-borne**  
2 **copiotrophs**

3

4 Oluwakemisola E. Olofintila<sup>1</sup>, and Zachary A. Noel<sup>1,#</sup>

5

6 <sup>1</sup>Department of Entomology and Plant Pathology, Auburn University, Auburn, AL, 36849

7 Olofintila ORCID = 0000-0002-3318-3478

8 Noel ORCID = 0000-0001-6375-8300

9

10

11

12

13

14

15

16

17

18

19

20 Competing interests

21 The authors declare no competing financial interests

22

23 # Corresponding author: Zachary A. Noel; ZAN0002@auburn.edu

## 24 **Abstract**

25           The spermosphere is the transient, immediate zone of soil around imbibing and  
26 germinating seeds, rich in microbial activity. It represents a habitat where there is contact  
27 between seed-associated microbes and soil microbes, but is studied less compared to other plant  
28 habitats. Previous studies on spermosphere microbiology were primarily culture-based or did not  
29 sample the spermosphere soil as initially defined in space and time. Thus, the objectives of this  
30 study were to develop an efficient strategy to collect spermosphere soils around imbibing  
31 soybean and cotton in non-sterile soil and investigate factors contributing to changes in microbial  
32 communities. The method employed sufficiently collected spermosphere soil as initially defined  
33 in space (3-10 mm soil around a seed) by constraining the soil sampled with a cork borer and  
34 confining the soil to a 12-well microtiter plate. Spermosphere prokaryote composition changed  
35 over time and depended on the crop within six hours after seeds were sown. By 12 to 18 hours,  
36 crops had unique microbial communities in spermosphere soils. Prokaryote evenness dropped  
37 following seed imbibition and the proliferation of copiotroph soil bacteria in the phyla  
38 Proteobacteria and Firmicutes. Due to their long history of plant growth promotion, prokaryote  
39 OTUs in *Bacillus*, *Paenibacillus*, *Burkholderia*, *Massilia*, *Azospirillum*, and *Pseudomonas* were  
40 notable genera enriched in the cotton and soybean spermosphere. There was no consistent  
41 evidence that fungal communities changed like prokaryotes. However, fungi and prokaryotes  
42 were hub taxa in cotton and soybean spermosphere networks. Additionally, the enriched taxa  
43 were not hubs in networks, suggesting other taxa besides the copiotrophic may be important for  
44 spermosphere communities. Overall, this study advances knowledge in the assembly of the plant  
45 microbiome early in a plant's life, which may have plant health implications in more mature  
46 plant growth stages.

47

## 48 **Introduction**

49           When a seed is sown, it imbibes water and releases nutrient-rich seed exudates that fuel  
50 interactions between soil and seed-associated microbes in a plant habitat called the spermosphere  
51 (Nelson 2004; Nelson 2018; Schiltz et al. 2015; Shade et al. 2017; Windstam and Nelson  
52 2008). Seed exudates have long been recognized to stimulate microbial growth, including a  
53 direct link to facilitating pathogen growth chemotactically towards seeds (Nelson 2004; Short  
54 1976; Slykhuis 1947; Stanghellini 1971). The spermosphere or “spermatosphere” was first  
55 described by Slykhuis (1947), who observed the inhibition of a fungal pathogen by three fungal  
56 species around a germinating seed. Verona (1958) defined the same habitat as a “zone of  
57 elevated microbial activity” around a germinating seed. Nelson (Nelson 1986, 1988; 2004; van  
58 Dijk and Nelson 2000; Windstam and Nelson 2008) more formally defined the spermosphere as  
59 “the short-lived, rapidly-changing and microbiologically dynamic five-to-ten-millimeter zone of  
60 soil around a germinating seed”, which is the definition we adhere to in this study. Despite its  
61 importance for plant health outcomes, the spermosphere is less studied than other plant-  
62 associated habitats such as the rhizosphere or phyllosphere (Aziz et al. 2022; Schiltz et al. 2015;  
63 Shade et al. 2017).

64           Seed germination occurs in three distinct phases. Phase I is a physical process  
65 characterized by seed imbibition and fast carbon-rich exudate release into the soil hours after  
66 seeds are sown. The highest levels of exudate release are completed in as little as six hours  
67 (Lynch 1978; Nelson 2004; Simon and Raja Harun 1972). The initial phase of exudate release  
68 is followed by a plateau characterizing phase II, then radical emergence, which begins the  
69 formation of the rhizosphere, and more exudate release in phase III (Nelson 2004; Schiltz et al.

70 2015).

71 The spermosphere represents a critical zone for establishing vertically inherited seed  
72 microbes, and horizontal interactions between soil and seed-associated microbes (Chesneau et al.  
73 2022; Chesneau et al. 2020; Rochefort et al. 2021; Shade et al. 2017; Simonin et al. 2022). The  
74 outcome of these interactions can affect the life or death of the plant soon after sowing seeds  
75 (McKellar and Nelson 2003; Windstam and Nelson 2008). For example, soil-borne *Pythium* can  
76 fully colonize and kill germinating seeds of various crop species within 12-24 hours (Hayman  
77 1969; Nelson 1986, 1988; Stanghellini 1973).

78 Spermosphere pathogens still cause millions of dollars in crop loss yearly (Allen et al.  
79 2017; Bradley et al. 2021; Mueller et al. 2020). Because of enhanced genetics and other factors,  
80 seed ranks first or second in operating costs borne by soybean and cotton farmers each year  
81 (USDA-ERS 2022). Additionally, trends toward earlier planting dates, increased frequency of  
82 heavy pulsed rain events, and variable temperature conditions experienced by farmers at planting  
83 can create soil moisture and temperature conditions that stress the germinating seed (Morris et al.  
84 2021; Munkvold 1999; Roth et al. 2020). Conservation tillage (low or no-till) can also lead to  
85 harboring plant pathogens on plant debris left in the field from the previous growing season  
86 (Bockus and Shroyer 1998). Consequently, the protection of seeds from pathogens that specialize  
87 in spermosphere colonization is vital to improved crop productivity.

88 Seed and seedling pathogens are primarily managed with chemical seed coatings  
89 containing fungicides and oomycides. However, improved knowledge on spermosphere  
90 microbiology and ecology would support the successful inclusion of alternative strategies to  
91 chemical seed treatments. For example, biocontrol of *Pythium* from seed-applied *Enterobacter*  
92 *cloacae* could be achieved by metabolizing long-chain fatty acids, which otherwise stimulated

93 the germination of *Pythium* sporangium (Kageyama and Nelson 2003; van Dijk and Nelson  
94 2000; Windstam and Nelson 2008). Studies on the spermosphere have either been culture-based  
95 or have more recently focused on the contribution of the indigenous seed microbiome by using  
96 sterile or soilless growth conditions or pre-imbibed or pre-germinated seeds, which do not  
97 sample the spatial and temporal properties of the spermosphere soil (Barret et al. 2015;  
98 Johnston-Monje et al. 2016; Moroenyane et al. 2021; Rochefort et al. 2021). Indeed, natural  
99 seed-associated epiphytes and endophytes compete with pathogens (Smith et al. 1999; Torres-  
100 Cortes et al. 2019). While commendable, these studies largely ignore the influence of the initial  
101 seed exudate release on the spermosphere soil microbes. Therefore, a mechanistic understanding  
102 of the complex interactions in spermosphere soil will aid in novel treatments for seed and  
103 seedling pathogens and help our understanding of plant microbiome assembly.

104         However, one major challenge in studying spermosphere soil using high-throughput  
105 culture-independent techniques may be a lack of a quick and efficient method of collecting  
106 spermosphere soil (Schiltz et al. 2015). Here, we aimed to capture changes in microbial diversity  
107 in the spermosphere soils as soybean and cotton seeds underwent phases I and II of seed  
108 germination (i.e., pre radical emergence). We sampled the spermosphere soil of cotton and  
109 soybean by constraining the soil zone within wells of a 12-well plate and sampling precisely  
110 three to six millimeters of soil around an imbibing seed with an appropriately sized cork borer,  
111 extracted DNA, and sequenced the 16S and ITS from cotton and soybean spermosphere soil. We  
112 hypothesized that seeds would imbibe water rapidly and follow previously established phases of  
113 exudate release, which would alter microbial diversity and co-occurrence patterns. We also  
114 hypothesized that spermosphere soils would be distinct based on crop species. Therefore, the  
115 objectives of this study were twofold: 1) characterize the bacterial and fungal microbial

116 communities associated with cotton and soybean spermosphere soil compared to control soil and  
117 2) determine how microbial diversity and co-occurrences change over time as a seed imbibes  
118 water.

119

## 120 **Materials and Methods**

121 **Soil collection and preparation.** The soil used in this study was collected from a field used for  
122 cotton, soybean, and corn rotation from Prattville Agricultural Research Unit in Prattville,  
123 Alabama (32.42533, -86.4452), since this soil showed consistent emergence of both cotton and  
124 soybean in preliminary experiments (*data not shown*), and was not known to contain a high  
125 abundance of any specific seedling pathogen. Approximately three liters of soil from the top ten  
126 centimeters were collected and transported to the lab. The soil was sieved to eliminate stones and  
127 pebbles and air-dried for 24 hours to ensure homogeneity in water content. The soil was used  
128 immediately after air drying. Six to seven grams (6 ml) of soil was transferred to each well of the  
129 12-well microtiter plates (VWR American cat no.:10861-556, USA), containing three one-  
130 millimeter holes in the bottom of all wells for drainage. Each well in the 12-well microtiter plates  
131 measured a total volume of 6.8 ml, depth of each well of a 12-well plate was 15 mm with a width  
132 of 23 mm. Each well containing soil was watered with 1.5 ml of sterile water (25% soil  
133 moisture), and the water was allowed to circulate for one hour before the seeds were sown.

134 Nontreated Williams-82 soybean or nontreated delinted Delta Pine 1646 B2XF cotton  
135 were used in this study and were sorted to discard discolored seeds or seeds with cracked seed  
136 coats (Nelson 1986). The weight of individual dry seeds was recorded before use and after  
137 imbibition to record how much water was imbibed. The initial weight of soybean seeds was  
138 between 170 and 250 mg, and cotton seeds weighed between 60 and 110 mg. The average size of

139 soybeans used was between five to eight millimeters in diameter and spherical. Cotton seeds  
140 were more oblong, three to four millimeters in diameter and ten millimeters long. Seeds were  
141 surface-sterilized by soaking in 6% bleach solution for 10 minutes in a sterile petri-dish and  
142 washed three times with sterile distilled water. Seeds were surface sterilized to maximize the  
143 effect of seed exudates on the growth of microbes from the soil. Six replicate seeds were sown  
144 into the center of individual wells, halfway into the 15 mm depth of the well, using flamed  
145 forceps. Wells containing only soil without a cotton or soybean seed were used as a control. The  
146 12-well microtiter plates were placed in a planting tray covered with a lid to keep the soil from  
147 drying. Planting trays containing 12-well microtiter plates were placed inside a growth chamber  
148 at 25°C.

149

150 **Collection of spermosphere.** Spermosphere soil samples were collected at 0, 6, 12, and 18 hours  
151 after sowing. Wells containing control soil were sampled as a control, and are hereafter referred  
152 to as control soil. Spermosphere soil and control soil samples were collected using an 11 mm  
153 cork borer cleaned of soil with 70% ethanol and flame sterilized between samples. The 11 mm  
154 cork borer was specifically used since the spermosphere is defined as the first 5-10 mm of soil  
155 around a germinating seed (Nelson 2004) and allowed soil collection within this range based on  
156 the seed sizes stated previously. Therefore, given the size of the well, the volume of soil used,  
157 and the seed sizes, the spermosphere soil sampled consisted of three to six millimeters on either  
158 side of a soybean seed and seven to ten millimeters above and below a soybean. Similarly, the  
159 spermosphere soil sampled for cotton consisted of seven to eight millimeters on either side and  
160 five to ten millimeters above and below the seed. A diagram of the sampling procedure for  
161 soybean is shown in Figure 1. In preliminary experiments, bacterial populations in spermosphere

162 soils sampled with this method increased significantly by 1.15 log in soybean and about 0.8 log  
163 in cotton compared to control soil (Supplemental Figure 1).

164 Spherosphere soil containing the seed inside the core within the cork borer was  
165 transferred into sterile envelopes, and 0.25 ml was immediately transferred to 2 ml disruptor  
166 tubes (Omega Bio-Tek E.Z.N.A Soil DNA; Norcross GA), then stored at -80°C until DNA  
167 extraction. The remaining soil clinging to the seed was washed off, the seed blotted dry of excess  
168 water, and the weight of the seed was recorded after sample collection and compared to the  
169 initial individual seed weight to determine the water imbibed by each seed.

170

171 **DNA extraction, amplification, and sequencing.** The total DNA was extracted from the  
172 spherosphere and control soils following the manufacturer's recommendation. Amplification  
173 and library construction of 16S or ITS rDNA was performed with a three-step Polymerase Chain  
174 Reaction (PCR) (Lundberg et al. 2013; Longley et al. 2020). Briefly, the 16S region of the  
175 ribosomal DNA (rDNA) was amplified using the forward and reverse primers 515F and 806R  
176 (Caporaso et al. 2011). Amplification of ITS used the primers ITS1F and ITS4. Following the  
177 amplification of the respective rDNA regions, the amplicons were linked to variants of  
178 frameshift primers, and then a 10 bp barcode was added for sample identification. Library  
179 negative controls consisted of DNA extraction without soil and no template PCR water controls.  
180 The ZymoBIOMICS microbial community DNA standard (Zymo Research, Irvine, CA) was  
181 used as a positive control mock community. A fungal synthetic mock community was used as a  
182 positive control for fungi (Palmer et al. 2018). DNA amplification was confirmed with gel  
183 electrophoresis, and successfully amplified libraries were normalized using SequelPrep™  
184 Normalization Plate Kit (Thermo Fisher, USA). Normalized amplicons were then pooled and



185 concentrated 20:1 using the 50K Dalton Millipore filters (Sigma-Aldrich, USA). The pooled  
186 library was cleaned using AMPure XP beads at a ratio of 0.7X (Beckman Coulter, USA).  
187 Cleaned amplicon pools were verified by gel electrophoresis, quantified using a Qubit  
188 fluorometer (Thermo Fisher, USA), and sequenced on an Illumina MiSeq 2x300 bp using the v3  
189 600 cycles kit at SeqCenter LLC (Pittsburgh, PA). Primers and cycling parameters to construct  
190 libraries were the same as in Noel (2022).

191  
192 **Read processing.** The quality of demultiplexed reads was assessed using the FastQC, and primer  
193 sequences were removed using cutadapt 4.0 (Martin 2011). Prokaryote 16S V4 sequences were  
194 merged using VSEARCH 2.21.1 (Rognes et al. 2016). Only forward fungal ITS1 reads were  
195 used since reverse reads did not overlap. Fungal reads were trimmed to remove the conserved  
196 18S regions. Reads were then truncated to equal length (fungi 200 bp, prokaryote 300 bp) and  
197 quality filtered using VSEARCH 2.21.1 with an expected error threshold of 1.0. Singletons were  
198 removed and reads *de novo* clustered based on 97% identity into prokaryote OTUs (pOTUs) or  
199 fungal OTUs (fOTUs) using USEARCH v11.0.667, which includes a chimera detection and  
200 removal step (Edgar 2010; Edgar et al. 2011). The resulting pOTUs were aligned using MAFFT  
201 v7.505 (Nakamura et al. 2018), and a phylogenetic tree was estimated using FastTree v2.1.20  
202 (Price et al. 2010), then midpoint rooted with FigTree v1.4.4 (Rambaut 2018). Taxonomy was  
203 assigned to resulting pOTUs using the SINTAX algorithm (Edgar 2016) against the SILVA  
204 138.1 database (Quast et al. 2013). Fungal taxonomy was assigned using the ribosomal database  
205 project's Naïve Bayesian Classifier algorithm against the UNITE fungal ITS database version  
206 9.0 (Nilsson et al. 2019).

207

208 **Data analysis.** Data were primarily analyzed using phyloseq v.1.34.0 (McMurdie and Holmes  
209 2013) and vegan v2.5-7 (Oksanen et al. 2022) of the statistical software R v.4.2.2. All plots were  
210 generated using the data visualization package ‘ggplot2 v.3.3.5’ (Wickham 2016). Contaminant  
211 OTUs detected in the negative controls were removed with decontam v1.10.0 (Davis et al. 2018).  
212 Samples with less than 10,000 were discarded. Fungal samples with less than 1000 reads were  
213 discarded due to low sequencing coverage.

214 Richness, Pielou’s evenness (Pielou 1966), and Faith’s Phylogenetic Diversity (Faith  
215 1992) were used to determine within sample diversity differences in diversity using Kruskal-  
216 Wallis one-way analysis of variance. Read counts were then normalized using the cumulative  
217 sum scaling with metagenomeSeq v1.32.0 (Paulson et al. 2013) and subjected to principal  
218 coordinate analysis based on Bray-Curtis distances for fungi and prokaryotes or Weighted  
219 Unifrac distances for prokaryotes only. This analysis was followed by a Permutational Analysis  
220 of Variance (PERMANOVA) implemented with the ‘adonis2’ function to determine the  
221 differences in centroids of the prokaryote or fungal communities across time points and soil  
222 versus spermosphere. Differences in multivariate dispersion were also evaluated using the  
223 ‘betadisper’ function.

224 Differential abundance analysis was conducted with Analysis of Compositions of  
225 Microbiomes with Bias Correction version 2 (ANCOM-BC2) (Lin and Peddada 2020).  
226 Significantly different OTUs were detected based on Holm-Bonferonii corrected p-values. Then,  
227 microbial co-occurrence networks with prokaryotes and fungi were constructed using SpiecEasi  
228 v1.1.2 (Kurtz et al. 2015) and compared between soybean spermosphere soil, cotton  
229 spermosphere soils, and control soil using NetCoMi v.1.1.0 (Peschel et al. 2021). For network  
230 construction, spermosphere soil samples and soil samples without seeds at 12 and 18 hours were

231 filtered to a common set of taxa with a relative abundance above 0.001% and occupancy above  
232 90%. Co-occurrence association matrices were estimated using the Meinshausen and Bühlmann  
233 algorithm with the ‘nlambda’ set to 100, sampled 100 times, and the ‘lambda.min.ratio’ set to 10<sup>-1</sup>.  
234 <sup>1</sup>. All resulting networks contained stability values of 0.048 or above, close to the 0.05 StARS  
235 algorithm stability target. Association matrices for spermosphere soils or control soil were  
236 compared using the ‘netAnalyse’ function from NetCoMi. Hub taxa were identified based on  
237 eigenvector centrality values above the 95% quantile of a fitted log-normal distribution.  
238 Comparison of the hub taxa composition was based on the Jaccard similarity index.

239       The Data files and scripts used for this analysis are available on GitHub  
240 (<https://github.com/Noel-Lab-Auburn/SpermosphereMicrobiome2022>). Raw sequence reads  
241 were deposited to the sequence read archive with the accession number PRJNA925866.

242

## 243 **Results**

244 **Sequencing outputs.** Mock OTUs for the fungi and prokaryotes made up 99.9% of the  
245 composition of the positive controls, indicating minimal cross-contamination. Nine prokaryotic  
246 OTUs were filtered after detection in negative control samples, resulting in 2,090,814 16S V4  
247 reads of 8088 OTUs across 71 samples with a median read depth of 29,237 reads per sample.  
248 Nineteen fungal OTUs were detected in negative controls and taken out, resulting in 2,534,301  
249 ITS1 reads with 1904 fungal OTUs across 69 samples and a median read depth of 37,933 reads  
250 per sample. Rarefaction curves indicate that much of the diversity was adequately captured  
251 (Supplemental Figure 2).

252

253 **Prokaryote community dominance correlates with water imbibition.** The individual

254 measurement of seed weight for soybean and cotton seeds before and after spermosphere  
255 collection indicate that water was imbibed from the surrounding soil (Fig. 2a). Overall, soybean  
256 seeds imbibed more (250-300 mg) than cotton seeds (50-80 mg) and both seeds increased in seed  
257 weight within the first six hours indicating imbibition within this timeframe, then a plateau after  
258 six hours.

259 We observed a reduction in prokaryote evenness (or increase in dominance) over time in  
260 spermosphere soils but not in control soil (Fig. 2b). At time-point 0, there was no significant  
261 difference in the evenness of prokaryote taxa ( $P = 0.18$ ), as expected. At 6 hours, we observed a  
262 reduction in the evenness of prokaryote taxa in soybean spermosphere soils, compared to cotton  
263 spermosphere ( $P = 0.004$ ) or control soil ( $P = 0.002$ ). At 12 and 18 hours, both cotton and  
264 soybean spermosphere samples had significantly reduced evenness compared to control soil and  
265 each other ( $P \leq 0.009$ ). Prokaryote evenness was significantly negatively correlated with water  
266 imbibition, meaning that as seeds imbibed water and released exudates, prokaryote communities  
267 became more dominant (cotton  $r = -0.58$ ,  $P < 0.001$ ; soybean  $r = -0.57$ ,  $P = 0.004$ ) (Fig. 2c).  
268 However, the crop did not alter prokaryote richness or phylogenetic diversity compared to  
269 control soil. Prokaryote richness and phylogenetic diversity dropped significantly over time  
270 regardless of habitat ( $P < 0.001$ ). Additionally, there was no consistent evidence that fungal  
271 richness or evenness was altered in spermosphere samples compared to control soil. Still, a few  
272 samples of soybean spermosphere soil and control soil dropped in evenness after 18 hours  
273 (Supplemental Figure 3), becoming more dominant in one fOTU2 *Fusarium* (Supplemental  
274 Figure 4).

275

276 **Spermosphere prokaryote composition depends on the crop.** Spermosphere soils had

277 different prokaryote community compositions than control soil. A visualization of the change in  
278 the most abundant prokaryote composition over time is shown in Figure 3. Prokaryote  
279 communities were driven by habitat ( $P < 0.001$ ), time since sowing ( $P < 0.001$ ), and interaction  
280 of both factors ( $P < 0.001$ ) (Supplemental Table 1). The interaction prompted a closer look into  
281 the differences observed between crops by splitting the data by time-point (Figure 4; Table 1). At  
282 0 hours, no significant difference in prokaryote communities existed between bulk soil compared  
283 to soybean and cotton spermosphere, as expected (Bray-Curtis,  $P = 0.452$ ; Weighted Unifrac,  $P$   
284  $= 0.192$ ). However, as early as 6 hours, we observed significant differences between control soil  
285 and spermosphere soil samples (Bray-Curtis,  $P < 0.001$ ; Weighted Unifrac  $P < 0.001$ ).  
286 Differences were extended through 12 hours (Bray-Curtis,  $P < 0.001$ ; Weighted Unifrac  $P <$   
287  $0.001$ ) and 18 hours (Bray-Curtis,  $P < 0.001$ ; Weighted Unifrac  $P < 0.001$ ), where it was clear  
288 the spermosphere formed unique community compositions within soybean or cotton. Further,  
289 differences in multivariate dispersions were not observed supporting true differences in centroids  
290 rather than group dispersions (Table 1). This same trend was not observed with fungi. Time did  
291 alter fungal community composition ( $P = 0.01$ ), but there was no evidence that soybean or cotton  
292 altered fungal community composition compared to control soils ( $P = 0.09$ ).

293

#### 294 **Enriched prokaryotes in the spermosphere have unique and shared taxa among crops.**

295 Differential abundance analysis determined sets of pOTUs significantly enriched in the  
296 spermosphere of cotton and soybean compared to control soil (Figure 5a; Supplemental Table 2.  
297 Ninety-four percent of the enriched taxa belonged to Proteobacteria (57%,  $n = 27$ ) and  
298 Firmicutes (36%,  $n = 17$ ). The remaining three belonged to the Actinobacteria. Within the  
299 Proteobacteria, the enriched taxa were spread across ten prokaryote families, with the most

300 enriched taxa in the Oxalobacteraceae (41%, n = 11). The majority of the enriched Proteobacteria  
301 were unidentified at the genus level (n = 12) but included *Massilia* (n = 3), *Noviherbaspirillum*  
302 (n = 2), *Burkholderia/Paraburkholderia* (n = 2), *Aquabacterium* (n = 1), *Pseudomonas* (n = 2),  
303 *Cupriavidus* (n = 1), *Pantoea* (n = 1), *Paucimonas* (n = 1), *Rubellimicrobium* (n = 1), and  
304 *Azospirillum* (n = 1) (Figure 5b). Within the Firmicutes, all but one pOTU belonged to the  
305 Bacilli class with the genera *Paenibacillus* (n = 8), *Bacillus* (n = 4), *Brevibacillus* (n = 1),  
306 *Exiguobacterium* (n = 1), and *Tumebacillus* (n = 1). Many enriched taxa were shared between  
307 cotton and soybean (n = 18), indicating that similar taxa take advantage of releasing exudates  
308 from seeds (Figure 5b). All the enriched pOTUs were present in control soil samples meaning it  
309 was unlikely they originated from the seed but were present in the soil and proliferated upon  
310 exudate release from the seeds.

311  
312 **Cotton and soybean spermosphere networks are more connected and have distinct**  
313 **microbial hub taxa.** Cotton and soybean spermosphere networks were compared to each other  
314 and to the control soil to determine if they contained different topologies, different sets of  
315 network hubs, and the centrality of spermosphere-enriched taxa. Overall, network topology  
316 parameters were similar between networks except for the number of separate components. In  
317 other words, the spermosphere soil networks mainly consisted of one more prominent  
318 component and fewer disconnected sub-networks than the control soil network (Figure 6). For  
319 example, the control soil network contained 30 components and 80 nodes within the largest  
320 component. Soybean and cotton spermosphere soil networks had more nodes within the largest  
321 component (cotton = 136, soybean = 121). However, control soil and a slightly higher positive  
322 edge percentage (61% without a seed, 58% cotton spermosphere, 52% soybean spermosphere)

323 (Supplemental Table 3).

324 Comparison between central nodes was significantly different, indicating that the hub  
325 taxa were different between networks given the same sets of taxa used to construct the networks  
326 (Table 2). Hub taxa for cotton consisted of six prokaryote OTUs and two fungal OTUs. Cotton  
327 prokaryote hubs consisted of three Archaea OTUs in the Nitrososphaeraceae family (pOTU1009,  
328 pOTU19, and pOTU12), two OTUs from the Gaiellales (pOTU46, pOTU119), and pOTU29  
329 *Massilia* (Figure 6a; Table 3). Fungal cotton hubs were fOTU56 *Fusarium chlamydosporum*, and  
330 a yeast fOTU36 *Hannaella oryzae* (Figure 6a; Table 3), whereas the soybean network had three  
331 fungal hub taxa: fOTU64 *Helicoma*, fOTU10 *Bartalinia pondoensis*, and an unidentified Fungus  
332 fOTU36 (Figure 6b; Table 3). Prokaryote hub taxa in the soybean spermosphere network  
333 contained pOTU11 *Sphingomonas*, pOTU132 *Nocardioides*, pOTU1559 *Chloroflexi* TK10,  
334 pOTU36 *Angustibacter*, and pOTU349 *Methylobacterium/Methylorubrum* (Figure 6b; Table 3).  
335 The network from the control soil contained only fungal hubs, different than the identities of  
336 spermosphere fungal hubs except for fOTU36 *Hannaella oryzae*. Spermosphere-enriched taxa  
337 included in the network analysis were not hub taxa indicating that although enriched in a  
338 spermosphere, other microbial taxa besides the enriched taxa play an essential role in  
339 maintaining spermosphere network structure (Figure 6).

340

## 341 **Discussion**

342 To our knowledge, this is the first study to use culture-independent sequencing to study  
343 soybean and cotton spermosphere soil microbiomes during the first phases of seed germination.  
344 The advancement that allowed this was the method that constrained non-sterile soil to wells  
345 within a 12-well plate and sampled around an imbibing seed with a cork borer. The technique

346 enabled the precise and efficient collection of spermosphere soils as defined in space and time  
347 (Nelson 2004), which we believe this represents a more realistic spermosphere habitat. The focus  
348 on spermosphere soil in the first phases of seed germination differs from other studies that pre-  
349 imbibe or pre-germinate seeds in axenic conditions. We hypothesized and observed a rapid  
350 increase in water imbibition followed by a plateau characterizing phase I and phase II of seed  
351 germination. Prokaryote community structure changed in as little as six hours for soybean and  
352 twelve hours for cotton. We did observe that crops had unique prokaryote community structures  
353 in the spermosphere that were distinct from the control soil, typified by differences in network  
354 hub taxa and network topologies. The differing hub taxa demonstrate that others besides the  
355 enriched taxa are integral to each crop's spermosphere community structure. However, despite  
356 the differences in composition and hub taxa, among the most important observations was the  
357 commonality in the enriched copiotrophic taxa with a long history of benefiting plant growth,  
358 such as *Bacillus*, *Paenibacillus*, *Burkholderia*, *Massilia*, *Azospirillum*, and *Pseudomonas*.

359 In this study, we further define the development of the spermosphere of cotton and  
360 soybean at six to twelve hours after sowing, which aligns with previous studies of increased  
361 spore germination and full colonization of cotton seeds by *Pythium ultimum* twelve hours after  
362 sowing (Nelson 1986, 1988). We observed an increase in water imbibed by both cotton and  
363 soybean seeds in the first six hours, which is consistent with previous reports that documented  
364 increased water imbibition and exudation within the first few hours after sowing (Simon and  
365 Raja Harun 1972). Imbibition ceased representing phase II of germination, indicating the  
366 saturation of nutrient reserves and synthesis of products required for the extending radicle  
367 (Nelson 2004).

368 Similar to several other studies, we observed the soil microbes respond to seed exudates



369 and dominated the spermosphere microbiomes (Buyer et al. 1999; Hardoim et al. 2012; Ofek et  
370 al. 2011). We observed changes in phylogenetic dissimilarity between crops, and since  
371 phylogenetically similar species are more likely to share ecological characteristics and functional  
372 traits (Morrissey et al. 2016), it may be expected that the spermosphere communities in our study  
373 changed in a functional capacity as in Buyer et al. (1999). However, we observed varying  
374 spermosphere prokaryote composition in different plant species, which may highlight the  
375 importance of sample collection at the initial stages of seed germination and imbibition rather  
376 than at later hours potentially after radicle emergence. Additionally, as in Buyer et al. (1999),  
377 future studies should also include other soils with inherently different communities to understand  
378 the contribution of different soil microbial pools to forming the spermosphere.

379         The difference between crops may have also been due to differences in the amount of  
380 water imbibed. We noticed that soybean imbibed more than cotton seeds, likely due to seed size  
381 (Soldan et al. 2021; Vančura 1972). Vančura and Hanzlíková (1972) demonstrated increased  
382 quantities of seed exudates as seed size increased. Different varieties of common bean have been  
383 shown to differ in the amount of seed exudates, with larger seeded varieties releasing more  
384 exudates (Kato et al. 1997). Thus, we speculate that the greater and faster turnover in microbial  
385 communities of the soybean spermosphere compared to cotton may be due to the larger size of  
386 soybean seeds and increased exudation, which potentially supported a larger habitat for the  
387 microbes to occupy. It also leaves the question if microbial communities would have converged  
388 on similar compositions if a later sampling point was included.

389         Regardless, as a result of water imbibition and seed exudation, we observed a change in  
390 dominance in the spermosphere microbiome over time with both crops. Ota et al. (1991) showed  
391 specific nitrogen-fixing bacteria had increased dominance in the spermosphere of cocklebur

392 seeds but not in soil. Upon revealing enriched taxa in soybean and cotton spermosphere soils, we  
393 found some commonalities. Importantly, Bacilli was enriched in both crop's spermosphere soils.  
394 Since these *Bacilli*, including *Tumebacillus*, *Paenibacillus*, and *Bacillus*, have historically been  
395 associated with plant growth promotion and disease protection and have commercial potential,  
396 they were notable. It indicates their ability to utilize seed exudates quickly for growth. Seed  
397 exudates have been reported to induce chemotaxis, seed colonization, and biofilm formation of  
398 *B. amyloliquefaciens* (*velezensis*) by enhancing active cell division (Yaryura et al. 2008).  
399 *Paenibacillus polymyxa* isolated from wheat and peanut rhizosphere increased the survival of  
400 *Arabidopsis thaliana* in the presence of the oomycete pathogen *Pythium aphanidermatum* when  
401 applied as root treatment (Timmusk et al. 2009). Identifying these enriched taxa is important for  
402 prioritizing future work on a mechanistic understanding of the spermosphere microbial  
403 interactions that will improve the development of efficacious biologically based disease solutions  
404 (Nelson 2004; Weller 2007).

405 In terms of seed versus soil origin, there were OTUs with a low relative abundance and  
406 low occupancy that only occurred in cotton or soybean spermosphere samples and were absent  
407 from the soil. However, we hesitate to conclude they originated from the seed without directly  
408 identifying seed epiphytes and endophytes since it was impossible to know if the unique  
409 microbes were seed associates colonizing the spermosphere or if rare members of the soil only  
410 present spermosphere samples by chance. Furthermore, surface disinfecting seeds used in this  
411 study likely reduced the number of seed epiphytes that would colonize the spermosphere. The  
412 implications of surface disinfecting seeds have been argued elsewhere (Barret et al. 2015;  
413 Schiltz et al. 2015; Shade et al. 2017). Another limitation of our approach that limited our ability  
414 to identify seed-associated microbes may be the use of OTUs rather than amplicon sequence

415 variants (ASVs) or zero radius OTUs (zOTUs). A finer clustering method may be better suited to  
416 studying the transmission of seed-associated microbes into the spermosphere since genotypes  
417 originating from the seed may be grouped within 97% OTUs originating from the soil. We  
418 recognize microbes originating from the seed can colonize seedlings and other plant organs,  
419 which can alter plant health (Bintarti et al. 2022b; Bintarti et al. 2022a; Chesneau et al. 2022;  
420 Chesneau et al. 2020; Johnston-Monje et al. 2016; Mitter et al. 2017; Rochefort et al. 2021;  
421 Shade et al. 2017; Simonin et al. 2022). For example, it was recently demonstrated that crop  
422 flowers sprayed with a beneficial bacterium can colonize endosperm and transmit to germinating  
423 seeds (Mitter et al. 2017). While the importance of seed-associated microbes on plant health is  
424 evident, little is known about seed endophytes and interactions with horizontally acquired soil  
425 organisms, which tend to contribute a large portion of the microbial diversity to the seedling  
426 microbiome (Buyer et al. 1999; Nelson 2018; Rochefort et al. 2021).

427         In terms of the microbial networks, we observed different hubs and different topologies  
428 given the same set of taxa used for network construction. While fungal diversity was not altered  
429 in this study, fungal OTUs were identified as hubs, potentially demonstrating meaningful  
430 interactions with in a spermosphere soil. Of most interest was the yeast *Hannella* since these  
431 fungi are commonly found in soils, the phyllosphere, and as part of the core seed and  
432 phyllosphere microbiome (Noel et al. 2022; Simonin et al. 2022; Yurkov 2018). *Dioszegia*, in  
433 the same family as *Hannaella*, was identified as a network hub in the phyllosphere (Agler et al.  
434 2016), and the closely related yeast *Bullera* has been a network hub of the soybean phyllosphere  
435 (Longley et al. 2020). These yeasts are generally non-pathogenic, but their ecological role is  
436 poorly understood (Gouka et al. 2022). The prokaryote hubs were also intriguing because cotton  
437 contained several Nitrososphaeraceae pOTUs, which likely are involved with ammonia-

438 oxidization in soils (Reyes et al. 2020). Cotton spermosphere hubs also had a *Massilia* pOTU.  
439 *Massilia* is known for below-ground associations and the ability to solubilize phosphate (Silva et  
440 al. 2017), but has also been found as a hub in above-ground plant tissues (Longley et al. 2020).  
441 For soybean, *Sphingomonas* and *Methylobacterium/Methylorubrum* pOTUs were notable  
442 network hubs since these genera have been demonstrated to be abundant in the phyllosphere and  
443 core seed microbiome and produce plant growth-promoting hormones and UVA-absorbing  
444 compounds (Kwak et al. 2014; Yoshida et al. 2017). The difference in hub taxa between crops  
445 demonstrates that soybean and cotton construct unique microbial communities early in life,  
446 which may have plant health consequences at or beyond the spermosphere stage.

447       However, spermosphere-enriched pOTUs were not identified as network hubs; instead,  
448 they were located more peripheral in the networks, indicating they may be copiotrophs  
449 responding quickly to the availability of carbon-rich exudates from the seeds (Torres-Cortes et  
450 al. 2018). Spermosphere networks were more connected with larger components than the soil  
451 network. Increased soil network complexity was associated with increased microbiome function  
452 (Wagg et al. 2019). Therefore, it may be hypothesized that seed exudates help stimulate  
453 associations between organisms or sub-communities and form more connected or stable  
454 communities. However, further research is needed to determine how topological features of  
455 networks are associated with plant health and why hub taxa connect to other taxa and help  
456 assemble plant microbiomes.

457       The technique used in this study enabled quick and efficient collection of spermosphere  
458 soil within phase I and II of seed germination and showed the enrichment of beneficial  
459 copiotrophic taxa. However, these copiotrophic taxa were not central to microbial networks. This  
460 technique could easily be applied to other sequencing methods like metagenomics or

461 metatranscriptomics for a better understanding of spermosphere soil microbiome functions.  
462 Coupled with sequencing the seed microbiomes will be powerful to study interactions between  
463 seed and seedling pathogens, chemical or biological seed treatments, and interactions with  
464 pathogens in the spermosphere – thereby improving knowledge of spermosphere ecology, which  
465 will lead to improved understanding of the plant microbiome.

466

#### 467 **Acknowledgement**

468 This work is/was supported by the USDA National Institute of Food and Agriculture, Hatch  
469 project 1025628. Additional support comes from the Alabama Farmer Federation Soybean and  
470 Cotton Committees and the Department of Entomology and Plant Pathology at Auburn  
471 University.

472

473

#### 474 **References**

475 Agler, M. T., Ruhe, J., Kroll, S., Morhenn, C., Kim, S. T., Weigel, D., and Kemen, E. M. 2016.  
476 Microbial Hub Taxa Link Host and Abiotic Factors to Plant Microbiome Variation. *PLoS*  
477 *Biol* 14:e1002352.

478 Allen, T. W., Bradley, C. A., Sisson, A. J., Byamukama, E., Chilvers, M. I., Coker, C. M.,  
479 Collins, A. A., Damicone, J. P., Dorrance, A. E., Dufault, N. S., Esker, P. D., Faske, T.  
480 R., Giesler, L. J., Grybauskas, A. P., Hershman, D. E., Hollier, C. A., Isakeit, T., Jardine,  
481 D. J., Kelly, H. M., Kemerait, R. C., Kleczewski, N. M., Koenning, S. R., Kurle, J. E.,  
482 Malvick, D. K., Markell, S. G., Mehl, H. L., Mueller, D. S., Mueller, J. D., Mulrooney, R.  
483 P., Nelson, B. D., Newman, M. A., Osborne, L., Overstreet, C., Padgett, G. B., Phipps, P.

484 M., Price, P. P., Sikora, E. J., Smith, D. L., Spurlock, T. N., Tande, C. A., Tenuta, A. U.,  
485 Wise, K. A., and Wrather, J. A. 2017. Soybean Yield Loss Estimates Due to Diseases in  
486 the United States and Ontario, Canada, from 2010 to 2014. *Plant Health Progress* 18:19-  
487 27.

488 Aziz, U., Rehmani, M. S., Wang, L., Luo, X., Xian, B., Wei, S., Wang, G., and Shu, K. 2022.  
489 Toward a Molecular Understanding of Rhizosphere, Phyllosphere, and Spermosphere  
490 Interactions in Plant Growth and Stress Response. *Critical Reviews in Plant Sciences*  
491 40:479-500.

492 Barret, M., Briand, M., Bonneau, S., Preveaux, A., Valiere, S., Bouchez, O., Hunault, G.,  
493 Simoneau, P., and Jacquesa, M. A. 2015. Emergence shapes the structure of the seed  
494 microbiota. *Appl Environ Microbiol* 81:1257-1266.

495 Bintarti, A. F., Sulesky-Grieb, A., Stopnisek, N., and Shade, A. 2022a. Endophytic Microbiome  
496 Variation Among Single Plant Seeds. *Phytobiomes Journal* 6:45-55.

497 Bintarti, A. F., Kearns, P. J., Sulesky-Grieb, A., and Shade, A. 2022b. Abiotic Treatment to  
498 Common Bean Plants Results in an Altered Endophytic Seed Microbiome. *Microbiol*  
499 *Spectr* 10:e0021021.

500 Bockus, W. W., and Shroyer, J. P. 1998. The impact of reduced tillage on soilborne plant  
501 pathogens. *Annu Rev Phytopathol* 36:485-500.

502 Bradley, C. A., Allen, T. W., Sisson, A. J., Bergstrom, G. C., Bissonnette, K. M., Bond, J.,  
503 Byamukama, E., Chilvers, M. I., Collins, A. A., Damicone, J. P., Dorrance, A. E.,  
504 Dufault, N. S., Esker, P. D., Faske, T. R., Fiorellino, N. M., Giesler, L. J., Hartman, G.  
505 L., Hollier, C. A., Isakeit, T., Jackson-Ziems, T. A., Jardine, D. J., Kelly, H. M.,  
506 Kemerait, R. C., Kleczewski, N. M., Koehler, A. M., Kratochvil, R. J., Kurle, J. E.,

507 Malvick, D. K., Markell, S. G., Mathew, F. M., Mehl, H. L., Mehl, K. M., Mueller, D. S.,  
508 Mueller, J. D., Nelson, B. D., Overstreet, C., Padgett, G. B., Price, P. P., Sikora, E. J.,  
509 Small, I., Smith, D. L., Spurlock, T. N., Tande, C. A., Telenko, D. E. P., Tenuta, A. U.,  
510 Thiessen, L. D., Warner, F., Wiebold, W. J., and Wise, K. A. 2021. Soybean Yield Loss  
511 Estimates Due to Diseases in the United States and Ontario, Canada, from 2015 to 2019.  
512 Plant Health Progress 22:483-495.

513 Buyer, J. S., Roberts, D. P., and Russek-Cohen, E. 1999. Microbial community structure and  
514 function in the spermosphere as affected by soil and seed type. Canadian Journal of  
515 Microbiology 45:138-144.

516 Chesneau, G., Laroche, B., Preveaux, A., Marais, C., Briand, M., Marolleau, B., Simonin, M.,  
517 and Barret, M. 2022. Single Seed Microbiota: Assembly and Transmission from Parent  
518 Plant to Seedling. mBio 13:e0164822.

519 Chesneau, G., Torres-Cortes, G., Briand, M., Darrasse, A., Preveaux, A., Marais, C., Jacques, M.  
520 A., Shade, A., and Barret, M. 2020. Temporal dynamics of bacterial communities during  
521 seed development and maturation. FEMS Microbiol Ecol 96.

522 Davis, N. M., Proctor, D. M., Holmes, S. P., Relman, D. A., and Callahan, B. J. 2018. Simple  
523 statistical identification and removal of contaminant sequences in marker-gene and  
524 metagenomics data. Microbiome 6:226.

525 Edgar, R. C. 2010. Search and clustering orders of magnitude faster than BLAST. Bioinformatics  
526 26:2460-2461.

527 Edgar, R. C. 2016. SINTAX: a simple non-Bayesian taxonomy classifier for 16S and ITS  
528 sequences. bioRxiv

- 529 Edgar, R. C., Haas, B. J., Clemente, J. C., Quince, C., and Knight, R. 2011. UCHIME improves  
530 sensitivity and speed of chimera detection. *Bioinformatics* 27:2194-2200.
- 531 Faith, D. P. 1992. Conservation evaluation and phylogenetic diversity. *Biological Conservation*  
532 61:1-10.
- 533 Gouka, L., Raaijmakers, J. M., and Cordovez, V. 2022. Ecology and functional potential of  
534 phyllosphere yeasts. *Trends Plant Sci* 27:1109-1123.
- 535 Hardoim, P. R., Hardoim, C. C., van Overbeek, L. S., and van Elsas, J. D. 2012. Dynamics of  
536 seed-borne rice endophytes on early plant growth stages. *PLoS One* 7:e30438.
- 537 Hayman, D. S. 1969. The influence of temperature on the exudation of nutrients from cotton  
538 seeds and on preemergence damping-off by *Rhizoctonia solani*. *Canadian Journal of*  
539 *Botany* 47:1663-1669.
- 540 Johnston-Monje, D., Lundberg, D. S., Lazarovits, G., Reis, V. M., and Raizada, M. N. 2016.  
541 Bacterial populations in juvenile maize rhizospheres originate from both seed and soil.  
542 *Plant and Soil* 405:337-355.
- 543 Kageyama, K., and Nelson, E. B. 2003. Differential inactivation of seed exudate stimulation of  
544 *Pythium ultimum* sporangium germination by *Enterobacter cloacae* influences biological  
545 control efficacy on different plant species. *Appl Environ Microbiol* 69:1114-1120.
- 546 Kato, K., Arima, Y., and Hirata, H. 1997. Effect of exudate released from seeds and seedling  
547 roots of common bean (*Phaseolus vulgaris*L.) on proliferation of *Rhizobium* sp.  
548 (*Phaseolus*). *Soil Science and Plant Nutrition* 43:275-283.
- 549 Kurtz, Z. D., Muller, C. L., Miraldi, E. R., Littman, D. R., Blaser, M. J., and Bonneau, R. A.  
550 2015. Sparse and compositionally robust inference of microbial ecological networks.  
551 *PLoS Comput Biol* 11:e1004226.



- 552 Kwak, M. J., Jeong, H., Madhaiyan, M., Lee, Y., Sa, T. M., Oh, T. K., and Kim, J. F. 2014.  
553 Genome information of *Methylobacterium oryzae*, a plant-probiotic methyloph in the  
554 phyllosphere. *PLoS One* 9:e106704.
- 555 Lin, H., and Peddada, S. D. 2020. Analysis of compositions of microbiomes with bias correction.  
556 *Nat Commun* 11:3514.
- 557 Longley, R., Noel, Z. A., Benucci, G. M. N., Chilvers, M. I., Trail, F., and Bonito, G. 2020. Crop  
558 Management Impacts the Soybean (*Glycine max*) Microbiome. *Front Microbiol* 11:1116.
- 559 Lynch, J. M. 1978. Microbial interactions around imbibed seeds. *Annals of Applied Biology*  
560 89:165-167.
- 561 Martin, M. 2011. Cutadapt removes adapter sequences from high-throughput sequencing reads.  
562 *EMBnet.journal* 17.
- 563 McKellar, M. E., and Nelson, E. B. 2003. Compost-induced suppression of *Pythium* damping-off  
564 is mediated by fatty-acid-metabolizing seed-colonizing microbial communities. *Appl*  
565 *Environ Microbiol* 69:452-460.
- 566 Mitter, B., Pfaffenbichler, N., Flavell, R., Compant, S., Antonielli, L., Petric, A., Berninger, T.,  
567 Naveed, M., Sheibani-Tezerji, R., von Maltzahn, G., and Sessitsch, A. 2017. A New  
568 Approach to Modify Plant Microbiomes and Traits by Introducing Beneficial Bacteria at  
569 Flowering into Progeny Seeds. *Front Microbiol* 8:11.
- 570 Moroenyane, I., Tremblay, J., and Yergeau, É. 2021. Soybean Microbiome Recovery After  
571 Disruption is Modulated by the Seed and Not the Soil Microbiome. *Phytobiomes Journal*  
572 5:418-431.

573 Morris, T. C., Vann, R. A., Heitman, J., Collins, G. D., and Heiniger, R. W. 2021. Maximizing  
574 soybean yield by understanding planting date, maturity group, and seeding rate  
575 interactions in North Carolina. *Crop Science* 61:4365-4382.

576 Morrissey, E. M., Mau, R. L., Schwartz, E., Caporaso, J. G., Dijkstra, P., van Gestel, N., Koch,  
577 B. J., Liu, C. M., Hayer, M., McHugh, T. A., Marks, J. C., Price, L. B., and Hungate, B.  
578 A. 2016. Phylogenetic organization of bacterial activity. *ISME J* 10:2336-2340.

579 Mueller, D. S., Wise, K. A., Sisson, A. J., Allen, T. W., Bergstrom, G. C., Bissonnette, K. M.,  
580 Bradley, C. A., Byamukama, E., Chilvers, M. I., Collins, A. A., Esker, P. D., Faske, T.  
581 R., Friskop, A. J., Hagan, A. K., Heiniger, R. W., Hollier, C. A., Isakeit, T., Jackson-  
582 Ziems, T. A., Jardine, D. J., Kelly, H. M., Kleczewski, N. M., Koehler, A. M., Koenning,  
583 S. R., Malvick, D. K., Mehl, H. L., Meyer, R. F., Paul, P. A., Peltier, A. J., Price, P. P.,  
584 Robertson, A. E., Roth, G. W., Sikora, E. J., Smith, D. L., Tande, C. A., Telenko, D. E.  
585 P., Tenuta, A. U., Thiessen, L. D., and Wiebold, W. J. 2020. Corn Yield Loss Estimates  
586 Due to Diseases in the United States and Ontario, Canada, from 2016 to 2019. *Plant*  
587 *Health Progress* 21:238-247.

588 Munkvold, G. P. 1999. Planting date affects crop diseases. Pages 50--51. Iowa State University.

589 Nakamura, T., Yamada, K. D., Tomii, K., and Katoh, K. 2018. Parallelization of MAFFT for  
590 large-scale multiple sequence alignments. *Bioinformatics* 34:2490-2492.

591 Nelson, E. B. 1986. Attachment of *Enterobacter cloacae* Hyphae of *Pythium ultimum*: Possible  
592 Role in the Biological Control of *Pythium* Preemergence Damping-Off. *Phytopathology*  
593 76.

- 594 Nelson, E. B. 1988. Biological Control of Pythium Seed Rot and Preemergence Damping-Off of  
595 Cotton with *Enterobacter cloacae* and *Erwinia herbicola* Applied as Seed Treatments.  
596 *Plant Disease* 72.
- 597 Nelson, E. B. 2004. Microbial dynamics and interactions in the spermosphere. *Annu Rev*  
598 *Phytopathol* 42:271-309.
- 599 Nelson, E. B. 2018. The seed microbiome: Origins, interactions, and impacts. *Plant and Soil*  
600 422:7-34.
- 601 Nilsson, R. H., Larsson, K. H., Taylor, A. F. S., Bengtsson-Palme, J., Jeppesen, T. S., Schigel,  
602 D., Kennedy, P., Picard, K., Glockner, F. O., Tedersoo, L., Saar, I., Koljalg, U., and  
603 Abarenkov, K. 2019. The UNITE database for molecular identification of fungi: handling  
604 dark taxa and parallel taxonomic classifications. *Nucleic Acids Res* 47:D259-D264.
- 605 Noel, Z. A., Longley, R., Benucci, G. M. N., Trail, F., Chilvers, M. I., and Bonito, G. 2022. Non-  
606 target impacts of fungicide disturbance on phyllosphere yeasts in conventional and no-till  
607 management. *ISME Commun* 2.
- 608 Ofek, M., Hadar, Y., and Minz, D. 2011. Colonization of cucumber seeds by bacteria during  
609 germination. *Environ Microbiol* 13:2794-2807.
- 610 Oksanen, J., Simpson, G., Blanchet, F., Kindt, R., Legendre, P., Minchin, P., O'Hara, R.,  
611 Solymos, P., Stevens, M., Szoecs, E., Wagner, H., Barbour, M., Bedward, M., Bolker, B.,  
612 Borcard, D., Carvalho, G., Chirico, M., De Caceres, M., Durand, S., Evangelista, H.,  
613 FitzJohn, R., Friendly, M., Furneaux, B., Hannigan, G., Hill, M., Lahti, L., McGlinn, D.,  
614 Ouellette, M., Ribeiro Cunha, E., Smith, T., Stier, A., Ter Braak, C., and Weedon, J.  
615 2022. *vegan: Community Ecology Package*. R package version 2.6-4.

- 616 Ota, H., Kurihara, Y., Satoh, S., and Esashi, Y. 1991. Development of acetylene reduction  
617 (nitrogen-fixation) activity on and around imbibed plant seeds. *Soil Biology and*  
618 *Biochemistry* 23:9-14.
- 619 Palmer, J. M., Jusino, M. A., Banik, M. T., and Lindner, D. L. 2018. Non-biological synthetic  
620 spike-in controls and the AMPtk software pipeline improve mycobiome data. *PeerJ*  
621 6:e4925.
- 622 Paulson, J. N., Stine, O. C., Bravo, H. C., and Pop, M. 2013. Differential abundance analysis for  
623 microbial marker-gene surveys. *Nat Methods* 10:1200-1202.
- 624 Peschel, S., Muller, C. L., von Mutius, E., Boulesteix, A. L., and Depner, M. 2021. NetCoMi:  
625 network construction and comparison for microbiome data in R. *Brief Bioinform* 22.
- 626 Pielou, E. C. 1966. The measurement of diversity in different types of biological collections.  
627 *Journal of Theoretical Biology* 13:131-144.
- 628 Price, M. N., Dehal, P. S., and Arkin, A. P. 2010. FastTree 2--approximately maximum-  
629 likelihood trees for large alignments. *PLoS One* 5:e9490.
- 630 Quast, C., Pruesse, E., Yilmaz, P., Gerken, J., Schweer, T., Yarza, P., Peplies, J., and Glockner,  
631 F. O. 2013. The SILVA ribosomal RNA gene database project: improved data processing  
632 and web-based tools. *Nucleic Acids Res* 41:D590-596.
- 633 Rambaut, A. 2018.
- 634 Reyes, C., Hodgskiss, L. H., Kerou, M., Pribasnik, T., Abby, S. S., Bayer, B., Kraemer, S. M.,  
635 and Schleper, C. 2020. Genome wide transcriptomic analysis of the soil ammonia  
636 oxidizing archaeon *Nitrososphaera viennensis* upon exposure to copper limitation. *ISME*  
637 *J* 14:2659-2674.

- 638 Rochefort, A., Simonin, M., Marais, C., Guillerm-Erckelboudt, A. Y., Barret, M., and Sarniguet,  
639 A. 2021. Transmission of Seed and Soil Microbiota to Seedling. *mSystems* 6:e0044621.
- 640 Rognes, T., Flouri, T., Nichols, B., Quince, C., and Mahe, F. 2016. VSEARCH: a versatile open  
641 source tool for metagenomics. *PeerJ* 4:e2584.
- 642 Roth, M. G., Webster, R. W., Mueller, D. S., Chilvers, M. I., Faske, T. R., Mathew, F. M.,  
643 Bradley, C. A., Damicone, J. P., Kabbage, M., Smith, D. L., and Walker, N. 2020.  
644 Integrated Management of Important Soybean Pathogens of the United States in  
645 Changing Climate. *Journal of Integrated Pest Management* 11.
- 646 Schiltz, S., Gaillard, I., Pawlicki-Jullian, N., Thiombiano, B., Mesnard, F., and Gontier, E. 2015.  
647 A review: what is the spermosphere and how can it be studied? *J Appl Microbiol*  
648 119:1467-1481.
- 649 Shade, A., Jacques, M. A., and Barret, M. 2017. Ecological patterns of seed microbiome  
650 diversity, transmission, and assembly. *Curr Opin Microbiol* 37:15-22.
- 651 Short, G. E. 1976. Carbohydrate Exudation from Pea Seeds: Effect of Cultivar, Seed Age, Seed  
652 Color, and Temperature. *Phytopathology* 66.
- 653 Silva, U. C., Medeiros, J. D., Leite, L. R., Morais, D. K., Cuadros-Orellana, S., Oliveira, C. A.,  
654 de Paula Lana, U. G., Gomes, E. A., and Dos Santos, V. L. 2017. Long-Term Rock  
655 Phosphate Fertilization Impacts the Microbial Communities of Maize Rhizosphere. *Front*  
656 *Microbiol* 8:1266.
- 657 Simon, E. W., and Raja Harun, R. M. 1972. Leakage during seed imbibition. *Journal of*  
658 *Experimental Botany* 23:1076-1085.

- 659 Simonin, M., Briand, M., Chesneau, G., Rochefort, A., Marais, C., Sarniguet, A., and Barret, M.  
660 2022. Seed microbiota revealed by a large-scale meta-analysis including 50 plant species.  
661 *New Phytol* 234:1448-1463.
- 662 Slykhuis, J. T. 1947. Studies on Fusarium Culmorum Blight of Crested Wheat and Brome Grass  
663 Seedlings. *Canadian Journal of Research* 25c:155-180.
- 664 Smith, K. P., Handelsman, J., and Goodman, R. M. 1999. Genetic basis in plants for interactions  
665 with disease-suppressive bacteria. *Proc Natl Acad Sci U S A* 96:4786-4790.
- 666 Soldan, R., Fusi, M., Cardinale, M., Daffonchio, D., and Preston, G. M. 2021. The effect of plant  
667 domestication on host control of the microbiota. *Commun Biol* 4:936.
- 668 Stanghellini, M. E. 1971. Radial Extent of the Bean Spermosphere and its Relation to the  
669 Behavior of *Pythium ultimum*. *Phytopathology* 61.
- 670 Stanghellini, M. E. 1973. Effect of Soil Water Potential on Disease Incidence and Oospore  
671 Germination of *Pythium aphanidermatum*. *Phytopathology* 63.
- 672 Timmusk, S., van West, P., Gow, N. A., and Huffstutler, R. P. 2009. *Paenibacillus polymyxa*  
673 antagonizes oomycete plant pathogens *Phytophthora palmivora* and *Pythium*  
674 *aphanidermatum*. *J Appl Microbiol* 106:1473-1481.
- 675 Torres-Cortes, G., Bonneau, S., Bouchez, O., Genthon, C., Briand, M., Jacques, M. A., and  
676 Barret, M. 2018. Functional Microbial Features Driving Community Assembly During  
677 Seed Germination and Emergence. *Front Plant Sci* 9:902.
- 678 Torres-Cortes, G., Garcia, B. J., Compant, S., Rezki, S., Jones, P., Preveaux, A., Briand, M.,  
679 Roulet, A., Bouchez, O., Jacobson, D., and Barret, M. 2019. Differences in resource use  
680 lead to coexistence of seed-transmitted microbial populations. *Sci Rep* 9:6648.
- 681 USDA-ERS. 2022. U.S. commodity costs and returns by region and by commodity.

- 682 van Dijk, K., and Nelson, E. B. 2000. Fatty acid competition as a mechanism by which  
683 *Enterobacter cloacae* suppresses *Pythium ultimum* sporangium germination and damping-  
684 off. *Appl Environ Microbiol* 66:5340-5347.
- 685 Vančura, V. H., A. 1972. Root exudates of plants:IV. Differences in chemical composition of seed  
686 and seedlings exudates. *Plant And Soil* 36:271-282.
- 687 Verona, O. 1958. La spermosphère. *Ann. Inst. Pasteur* 95:795–798.
- 688 Wagg, C., Schlaeppli, K., Banerjee, S., Kuramae, E. E., and van der Heijden, M. G. A. 2019.  
689 Fungal-bacterial diversity and microbiome complexity predict ecosystem functioning.  
690 *Nat Commun* 10:4841.
- 691 Weller, D. M. 2007. *Pseudomonas* biocontrol agents of soilborne pathogens: looking back over  
692 30 years. *Phytopathology* 97:250-256.
- 693 Wickham, H. 2016. *ggplot2: Elegant Graphics for Data Analysis*. Springer-Verlag, New York.
- 694 Windstam, S., and Nelson, E. B. 2008. Differential interference with *Pythium ultimum*  
695 sporangial activation and germination by *Enterobacter cloacae* in the corn and cucumber  
696 spermospheres. *Appl Environ Microbiol* 74:4285-4291.
- 697 Yaryura, P. M., Leon, M., Correa, O. S., Kerber, N. L., Pucheu, N. L., and Garcia, A. F. 2008.  
698 Assessment of the role of chemotaxis and biofilm formation as requirements for  
699 colonization of roots and seeds of soybean plants by *Bacillus amyloliquefaciens*  
700 BNM339. *Curr Microbiol* 56:625-632.
- 701 Yoshida, S., Hiradate, S., Koitabashi, M., Kamo, T., and Tsushima, S. 2017. Phyllosphere  
702 *Methylobacterium* bacteria contain UVA-absorbing compounds. *J Photochem Photobiol*  
703 B 167:168-175.
- 704 Yurkov, A. M. 2018. Yeasts of the soil - obscure but precious. *Yeast* 35:369-378.

705 **Table and Figures**

706 **Table 1.** Permutational Analysis of Variance (PERMANOVA) and dispersion for prokaryote  
707 communities separated by time post sowing based on Bray-Curtis and weighted Uni-frac  
708 distances

709

710 **Table 2.** Comparison of centrality network parameters

711

712 **Table 3.** Hub taxa identified for each habitat

713

714 **Supplemental Table 1.** Permutational Analysis of Variance (PERMANOVA) for prokaryote and  
715 fungal communities

716

717 **Supplemental Table 2.** Differentially abundant bacterial taxa in soybean and cotton  
718 spermosphere soils

719

720 **Supplemental Table 3.** Topological properties of networks

721

722 **Figure 1. Diagram depicting the sampling technique used for sampling spermosphere soils.**

723 The spermosphere is defined as the 5-10 mm of soil directly surrounding a seed. (a) Photo  
724 demonstrating the sampling technique of spermosphere soil contained within an 11 mm cork  
725 borer. (b) Sampling with an 11 mm cork borer inside the confining space within wells of a 12-  
726 well plate allowed direct and controlled sampling of the spermosphere around single seeds.

727



728 **Figure 2. Prokaryote spermosphere evenness follows water imbibition.** (a) Water imbibition  
729 over time for cotton and soybean seeds (n = 6). (b) Prokaryote evenness over time in control soil,  
730 soybean spermosphere soil, or cotton spermosphere soil. Soybean had significantly lower  
731 evenness (higher dominance) after 6, 12, and 18 hours compared to control soil. Cotton followed  
732 the same trend but was significantly less even after 12 and 18 hours. Comparisons were made  
733 with Wilcox ranked sign test ( $\alpha = 0.05$ ; n = 6) (c) Spearman correlation between prokaryote  
734 evenness and water imbibition.

735

736 **Figure 3. Composition of the most abundant prokaryote OTUs changes over time.** Relative  
737 abundance of the top twenty most abundant prokaryote OTUs shifts over time within soybean  
738 spermosphere soil, cotton spermosphere soil, or control soil.

739

740 **Figure 4. Prokaryote spermosphere composition changes over time and crop.** (a-d) Principal  
741 coordinate analysis based on Weighted Unifrac distances. (e-h) Principal coordinate analysis  
742 based on Bray-Curtis distances. Reported significance values above each plot are the result of a  
743 permutational test of variance ( $\alpha = 0.05$ ; n = 6). Accompanying dispersion tests are shown in  
744 Table 1.

745

746 **Figure 5. Differential abundance of prokaryote OTUs shows enrichment of specific taxa**  
747 **within the spermosphere.** (a) Points represent individual OTUS. Positive values on the x-axis  
748 indicate the OTU was numerically more abundant in a soybean spermosphere compared to soil  
749 without a soybean seed. Similarly, positive y-axis values indicate the OTU was numerically  
750 more abundant in a cotton spermosphere compared to soil without a cotton seed. Colored points

751 are pOTUs detected as significantly different in soybean or cotton. Grey circle points are non-  
752 significant. Point shape indicates significance in one crop or both. Points are colored by the  
753 prokaryote order. Significance was determined within the ANCOM-BC2 algorithm with a Holm-  
754 Bonferroni correction ( $\alpha=0.05$ ). (b) Composition of significantly enriched pOTUs colored by  
755 genera.

756

757 **Figure 6. Spermosphere soils have different topological properties and different sets of hub**  
758 **taxa compared to control soil.** Networks for (a) cotton spermosphere soil and (b) soybean  
759 spermosphere soil and (c) control soil were constructed with the same set of taxa. Nodes with  
760 different shape and colors indicate the prokaryote or fungal class. Less transparent nodes are  
761 significant hubs based on eigenvector centrality above the 95% quantile. Nodes with red outlines  
762 were significantly enriched in a spermosphere as detected in Fig.4.

763

764 **Supplemental Figure 1.** Preliminary experiment conducted to demonstrate the effectiveness of  
765 the sampling procedure shown in Figure 1. Bacterial populations within spermosphere were  
766 greater in soybean or cotton spermosphere soils compared to control soil.

767

768 **Supplemental Figure 2.** Sequencing outputs for prokaryotes (16S) and fungi (ITS). (a)  
769 Composition and taxonomic output of the mock community samples. (b) rarefaction curves for  
770 prokaryotes and fungi. Dashed lines indicate the median read depth. (c) contaminant filtering  
771 based on OTU prevalence in negative control samples. (d) Histogram of read depth per sample.

772

773 **Supplemental Figure 3.** Within sample diversity measurements for soybean or cotton  
774 spermosphere samples compared to control soil. (a) prokaryote richness significantly dropped  
775 over time ( $P < 0.001$ ) consistently across habitats (spermosphere or soil without seed). (b)  
776 Similarly, Faith's phylogenetic distance also followed a similar pattern. No consistent  
777 differences were observed over time or between habitats for fungal (c) richness or (d) evenness.

778  
779 **Supplemental Figure 4.** Fungal composition of the top 20 most abundant Fungal OTUs in  
780 cotton spermosphere soil, soybean spermosphere soil, or control soil.

781

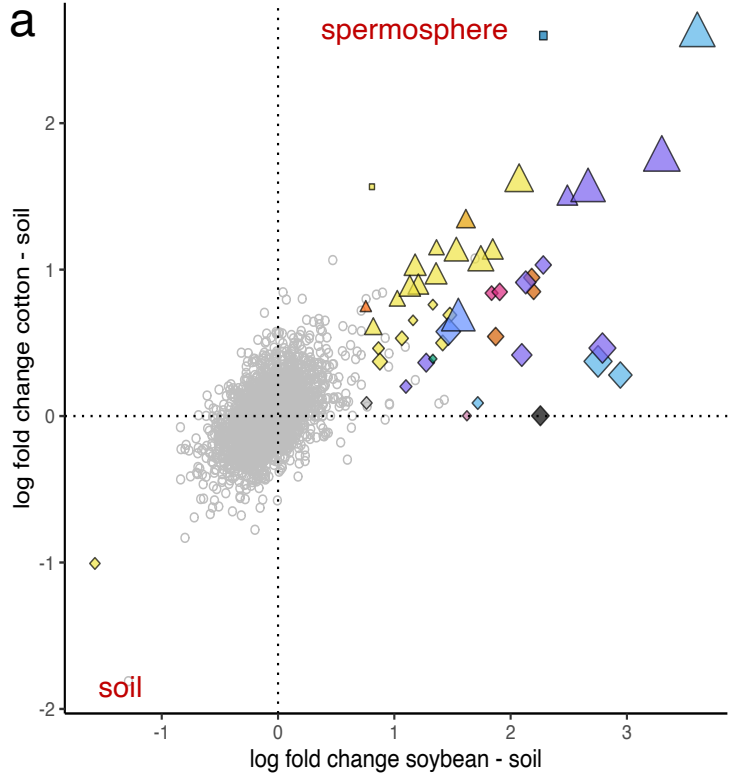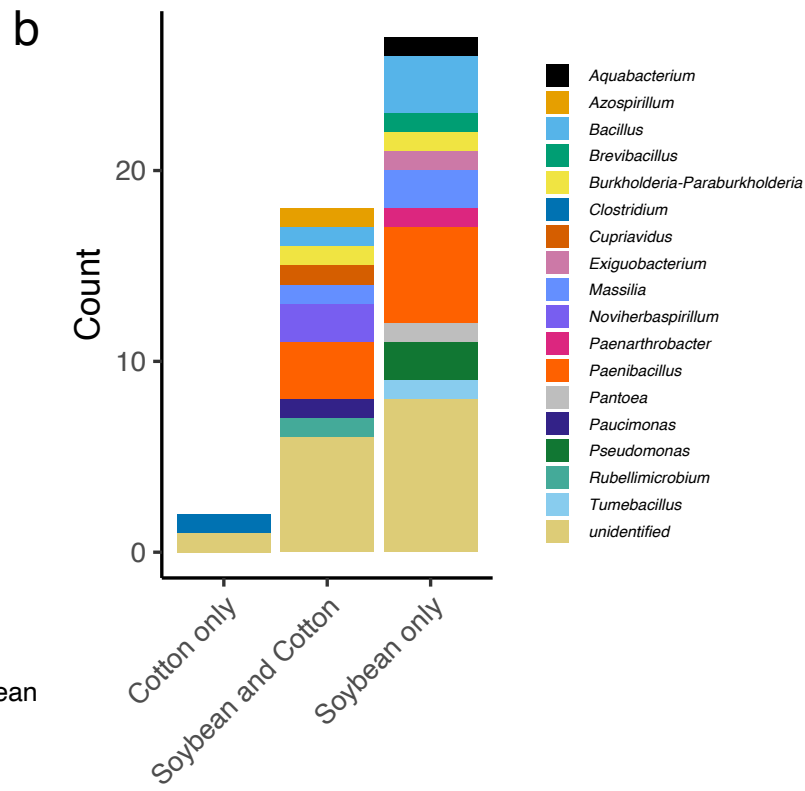

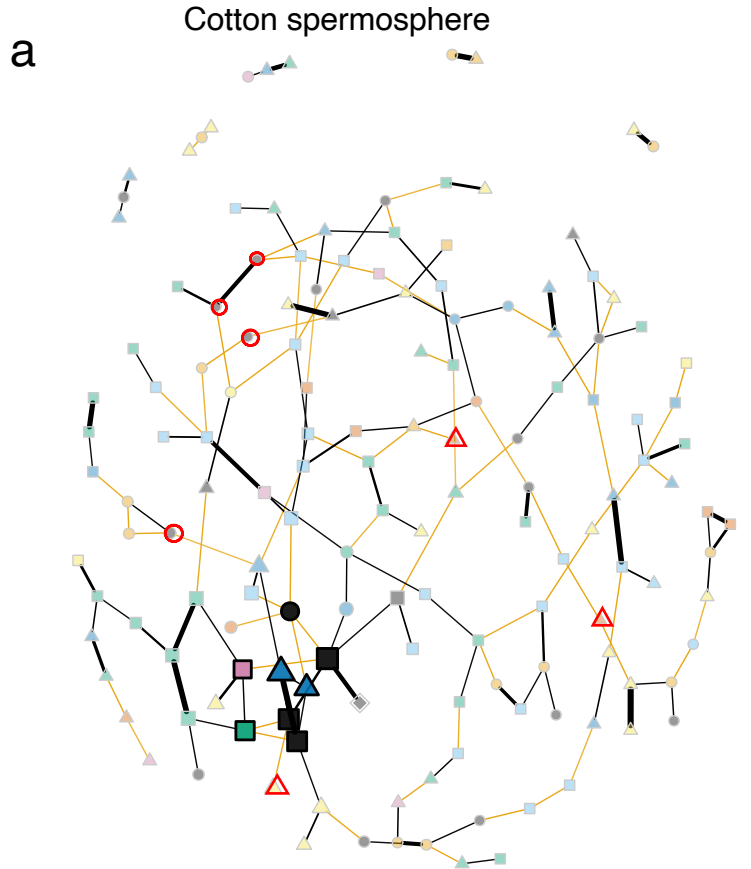

N components = 9  
 N components excluding isolated nodes = 6  
 N nodes in largest component = 136

- Gammaproteobacteria
- Alphaproteobacteria
- Nitrospira
- Myxococcia
- bacteriap25
- Verrucomicrobiae
- Methylomirabilia
- Entotheonellia
- ▲ Vicinamibacteria

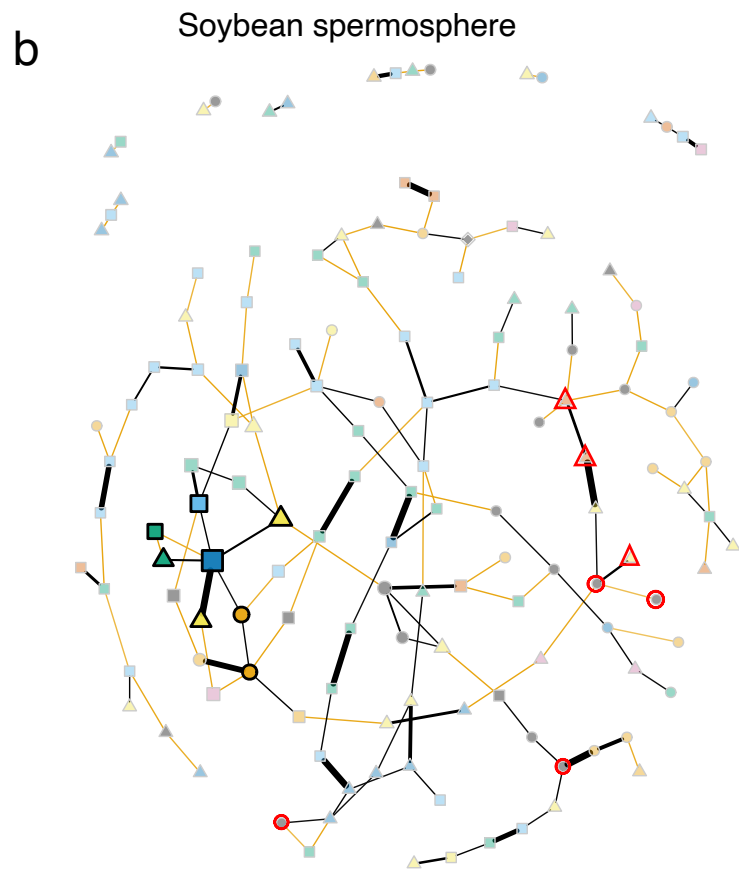

N components = 20  
 N components excluding isolated nodes = 8  
 N nodes in largest component = 121

- ▲ Acidobacteriae
- ▲ Chloroflexia
- ▲ TK10
- ▲ Actinobacteria
- ▲ Thermoleophila
- ▲ Bacilli
- ▲ Gemmatimonadetes
- Nitrososphaeria
- Blastocatellia

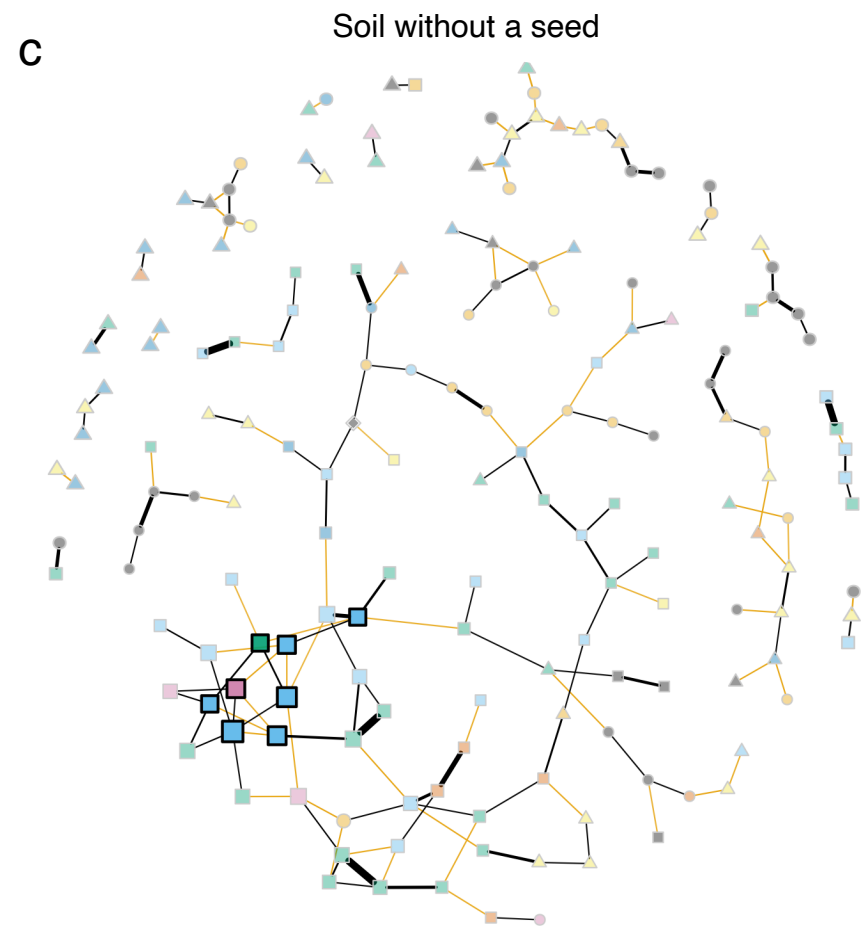

N components = 30  
 N components excluding isolated nodes = 21  
 N nodes in largest component = 80

- Dothideomycetes
- Sordariomycetes
- Leotiomyces
- unidentified Fungi
- Mortierellomycetes
- Tremellomycetes
- ◆ Eurotiomycetes

— Negative co-association  
 — Positive co-association

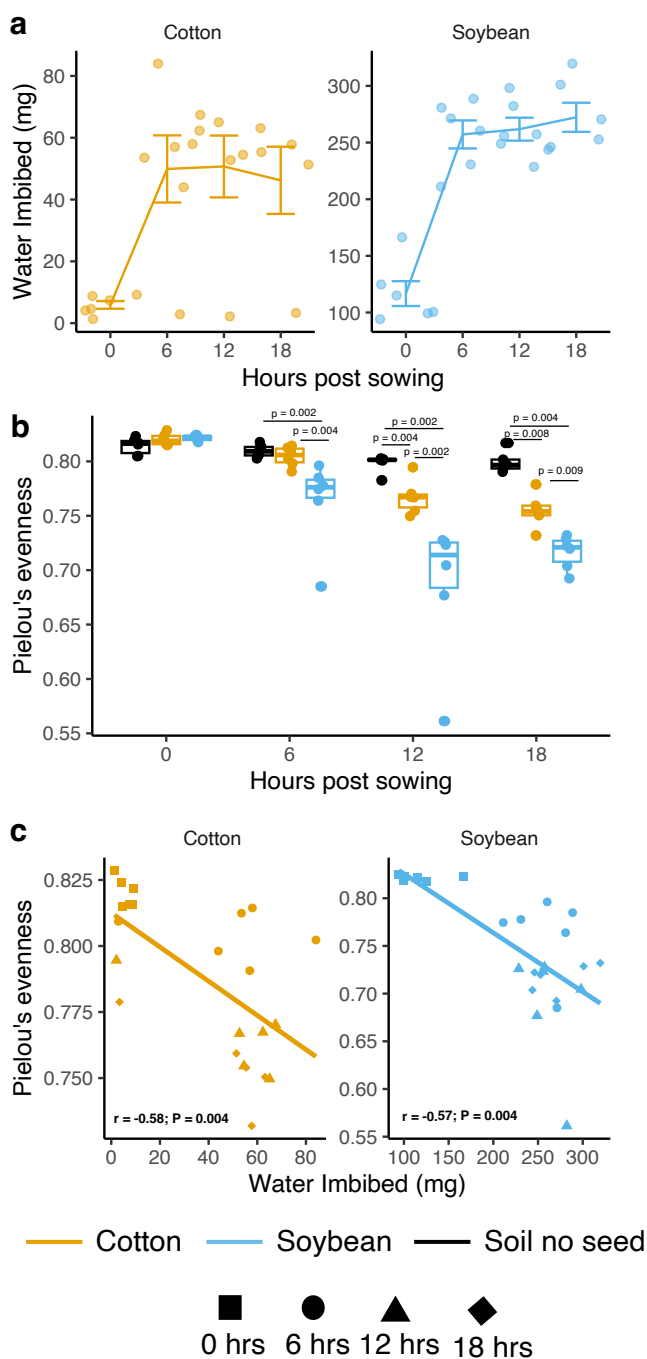

# Prokaryote

Relative abundance (%)

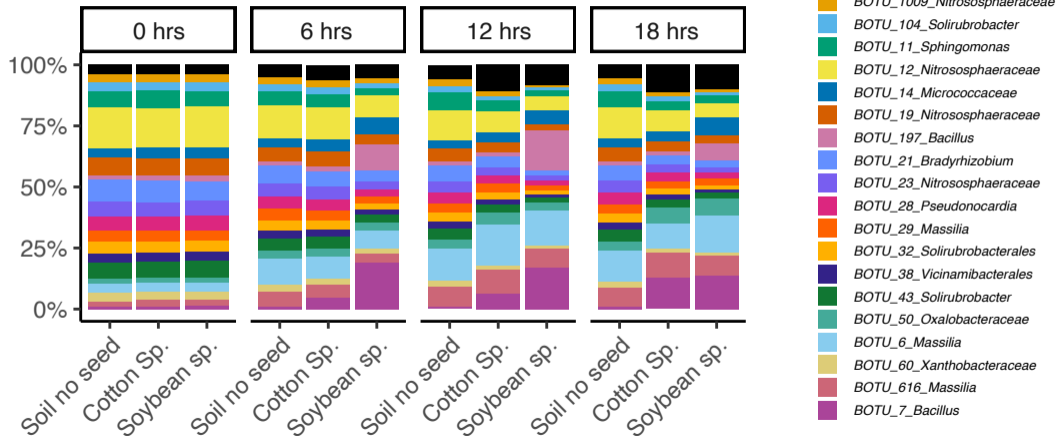

● Soil no seeds ● Cotton spermosphere ● Soybean spermosphere

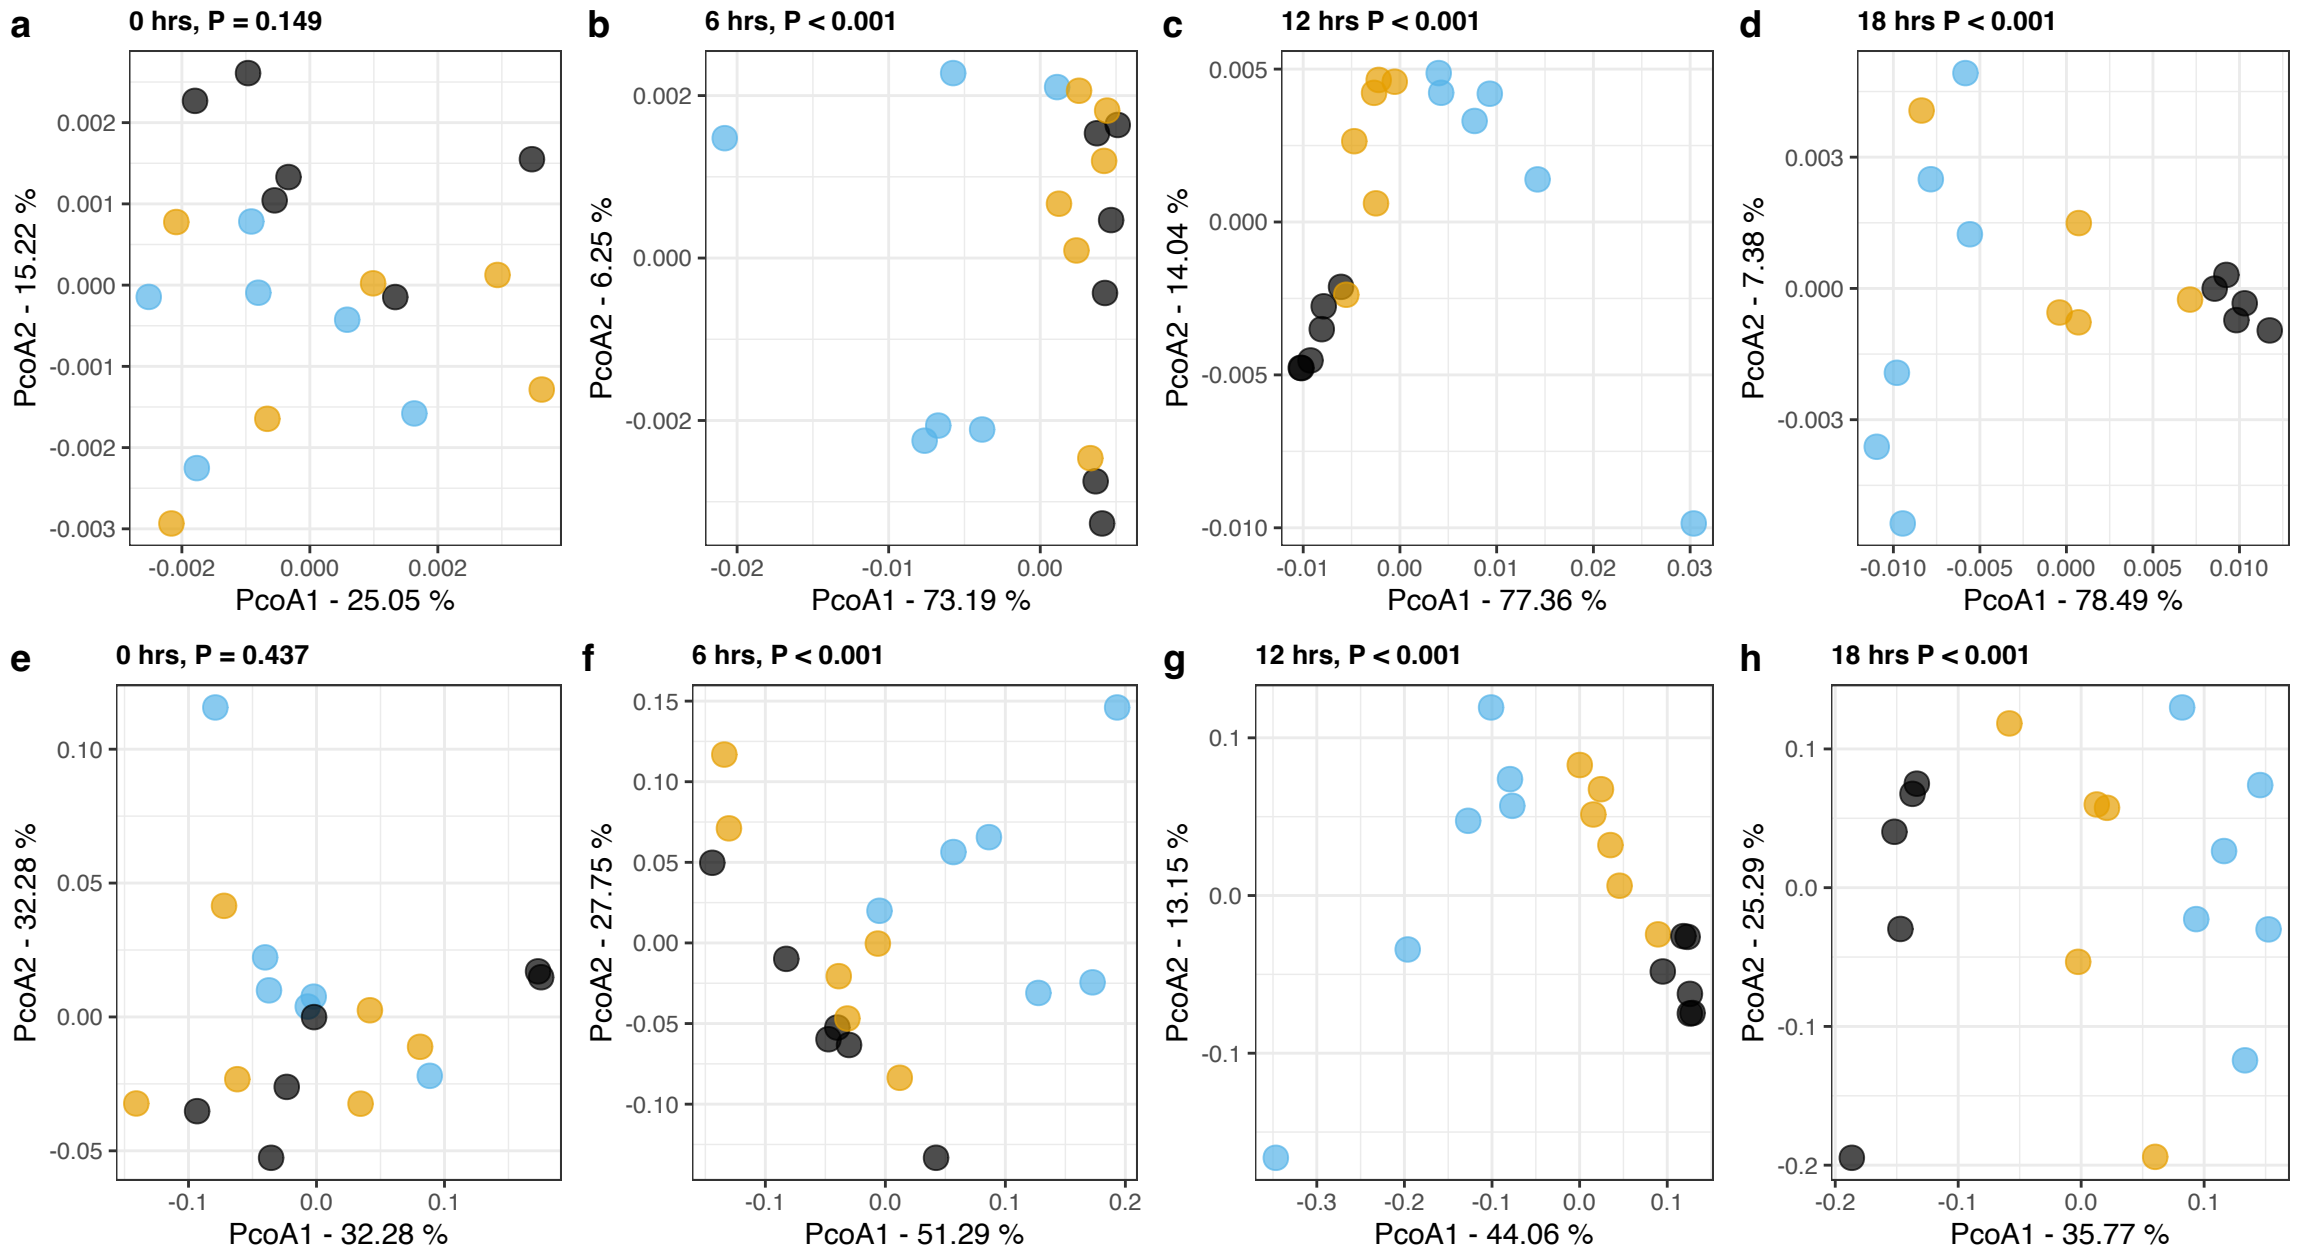



**a** Spermiosphere = 5-10 mm  
soil around seed

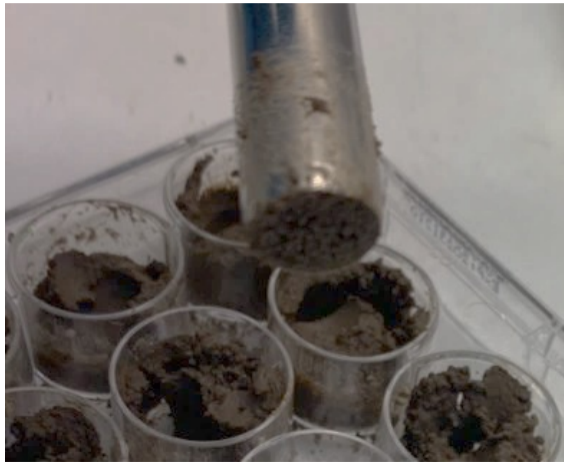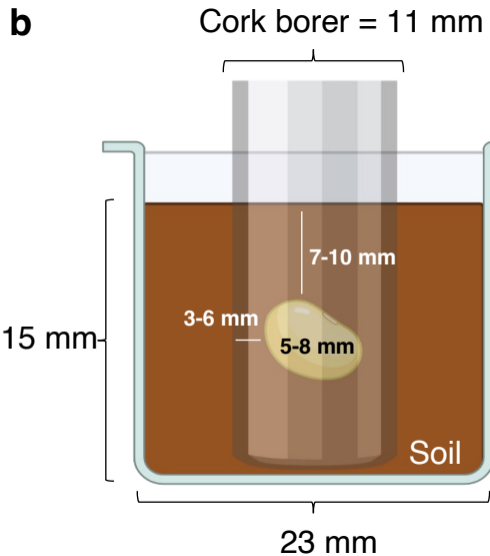

Table 3. Hub taxa identified for each habitat

| Crop                | OTU      | Taxonomy                               |
|---------------------|----------|----------------------------------------|
| Cotton              |          |                                        |
| spermosphere soil   | pOTU46   | Gaiellales                             |
|                     | pOTU119  | Gaiellales                             |
|                     | pOTU29   | <i>Massilia</i>                        |
|                     | pOTU1009 | Nitrososphaeraceae                     |
|                     | pOTU19   | Nitrososphaeraceae                     |
|                     | pOTU12   | Nitrososphaeraceae                     |
|                     | fOTU36   | <i>Hannaella oryzae</i>                |
|                     | fOTU56   | <i>Fusarium chlamydosporum</i>         |
| Soybean             |          |                                        |
| spermsphere soil    | pOTU1559 | Chloroflexi TK10                       |
|                     | pOTU132  | Nocardioides                           |
|                     | pOTU36   | Angustibacter                          |
|                     | pOTU11   | <i>Sphingomonas</i>                    |
|                     | pOTU349  | <i>Methylobacterium /Methylorubrum</i> |
|                     | fOTU64   | <i>Helicoma</i>                        |
|                     | fOTU36   | Fungi                                  |
|                     | fOTU10   | <i>Bartalinia pondoensis</i>           |
| Soil without a seed | fOTU1    | <i>Stagonosporopsis oculi-hominis</i>  |
|                     | fOTU13   | Teichosporaceae                        |
|                     | fOTU15   | Cucurbitariaceae                       |
|                     | fOTU17   | <i>Alternaria tenuissima</i>           |
|                     | fOTU22   | Neopestalotiopsis                      |
|                     | fOTU32   | Pleosporales                           |
|                     | fOTU36   | <i>Hannaella oryzae</i>                |
|                     | fOTU4    | <i>Cladosporium cladosporioides</i>    |

Table 2. Comparison of centrality network parameters

| Centrality network parameter | Cotton vs. Soybean         |         | Cotton vs. Control soil    |       | Soybean vs. Control soil   |         |
|------------------------------|----------------------------|---------|----------------------------|-------|----------------------------|---------|
|                              | Jaccard index <sup>a</sup> | P       | Jaccard index <sup>a</sup> | P     | Jaccard index <sup>a</sup> | P       |
| degree                       | 0.034                      | < 0.001 | 0.128                      | 0.001 | 0.044                      | < 0.001 |
| betweenness centrality       | 0.154                      | < 0.001 | 0.156                      | 0.001 | 0.154                      | < 0.001 |
| closeness centrality         | 0.152                      | < 0.001 | 0.246                      | 0.092 | 0.206                      | 0.019   |
| eigenvector centrality       | 0.169                      | 0.003   | 0.188                      | 0.007 | 0.206                      | 0.019   |
| hub taxa                     | 0.000                      | 0.002   | 0.067                      | 0.019 | 0.000                      | 0.001   |

<sup>a</sup>Jaccard index of 1 indicates perfect agreement between soybean or cotton spermosphere networks

Table 1. Permutational Analysis of Variance (PERMANOVA) and dispersion for prokaryote communities separated by time post sowing based on Bray-Curtis and weighted Uni-frac distances

| Dissimilarity Metric | Hours post sowing | df | PERMANOVA <sup>a</sup> |        |        | Dispersion |       |
|----------------------|-------------------|----|------------------------|--------|--------|------------|-------|
|                      |                   |    | R <sup>2</sup>         | F      | P      | F          | P     |
| Bray-Curtis          | 0                 | 2  | 0.113                  | 0.959  | 0.437  | 0.937      | 0.407 |
|                      | 6                 | 2  | 0.273                  | 2.815  | <0.001 | 0.539      | 0.606 |
|                      | 12                | 2  | 0.424                  | 5.517  | <0.001 | 0.828      | 0.533 |
|                      | 18                | 2  | 0.417                  | 4.648  | <0.001 | 0.092      | 0.911 |
| Weighted Unifrac     | 0                 | 2  | 0.142                  | 1.238  | 0.192  | 1.898      | 0.190 |
|                      | 6                 | 2  | 0.491                  | 7.245  | <0.001 | 2.538      | 0.066 |
|                      | 12                | 2  | 0.609                  | 11.675 | <0.001 | 1.186      | 0.376 |
|                      | 18                | 2  | 0.696                  | 14.863 | <0.001 | 1.401      | 0.304 |

<sup>a</sup>Permanova and dispersion tests were performed on 999 permutations
